# Supplementary material for: Hydrogel is Superior to Fibrin Gel as Matrix of Stem Cells in Alleviating Antigen-Induced Arthritis
Source: Polymers (Basel). 2016 May 6;8(5):182. doi: 10.3390/polym8050182 (PMC6431989; doi:10.3390/polym8050182)
Supplement: Supplementary file 1 [file polymers-08-00182-s001.pdf]

# Supplementary Materials: Hydrogel is Superior to Fibrin Gel as Matrix of Stem Cells in Alleviating Antigen-Induced Arthritis

He Liu, Jianxun Ding, Chen Li, Chenyu Wang, Yinan Wang, Jincheng Wang and Fei Chang

**Table S1.** ICRS macroscopic evaluation of cartilage repair.

| <b>Cartilage repair assessment ICRS</b>                                             | <b>Points</b> |
|-------------------------------------------------------------------------------------|---------------|
| <b>Degree of defect repair</b>                                                      |               |
| In level with surrounding cartilage                                                 | 4             |
| 75% repair of defect depth                                                          | 3             |
| 50% repair of defect depth                                                          | 2             |
| 25% repair of defect depth                                                          | 1             |
| 0% repair of defect depth                                                           | 0             |
| <b>Integration to border zone</b>                                                   |               |
| Complete integration with surrounding cartilage                                     | 4             |
| Demarcating border <1 mm                                                            | 3             |
| 3/4th of graft integrated, 1/4th with a notable border > 1 mm width                 | 2             |
| 1/2 of graft integrated with surrounding cartilage, 1/2 with a notable border >1 mm | 1             |
| From no contact to 1/4th of graft integrated with surrounding cartilage             | 0             |
| <b>Macroscopic appearance</b>                                                       |               |
| Intact smooth surface                                                               | 4             |
| Fibrillated surface                                                                 | 3             |
| Small, scattered fissures or cracs                                                  | 2             |
| Several, small or few but large fissures                                            | 1             |
| Total degeneration of grafted area                                                  | 0             |
| <b>Overall repair assessment</b>                                                    |               |
| Grade I: normal                                                                     | 12            |
| Grade II: nearly normal                                                             | 11–8          |
| Grade III: abnormal                                                                 | 7–4           |
| Grade IV: severely abnormal                                                         | 3–1           |

**Table S2.** Histological grading scale for cartilage regeneration.

| <b>Description</b>                             | <b>Points</b> |
|------------------------------------------------|---------------|
| <b>Cell morphology</b>                         |               |
| Hyaline cartilage                              | 0             |
| Mostly hyaline cartilage                       | 1             |
| Mostly fibrocartilage                          | 2             |
| Mostly non-cartilage                           | 3             |
| Non-cartilage only                             | 4             |
| <b>Matrix staining (metachromasia)</b>         |               |
| Normal (compared with host adjacent cartilage) | 0             |
| Slightly reduced                               | 1             |
| Markedly reduced                               | 2             |
| No metachromatic stain                         | 3             |

Table S2. Cont.

| Description                                              | Points    |
|----------------------------------------------------------|-----------|
| <b>Surface regularity</b>                                |           |
| Smooth ( $>3/4$ )                                        | 0         |
| Moderate ( $>1/2-3/4$ )                                  | 1         |
| Irregular ( $1/4-1/2$ )                                  | 2         |
| Severely irregular ( $<1/4$ )                            | 3         |
| <b>Thickness of cartilage</b>                            |           |
| $>2/3$                                                   | 0         |
| $1/3-2/3$                                                | 1         |
| $<1/3$                                                   | 2         |
| <b>Integration of donor with host adjacent cartilage</b> |           |
| Both edges integrated                                    | 0         |
| One edge integrated                                      | 1         |
| Neither edge integrated                                  | 2         |
| <b>Maximum total</b>                                     | <b>14</b> |

Table S3. Modified OARSI scores to evaluate cartilage status microscopically.

| Feature                                                               | Score |
|-----------------------------------------------------------------------|-------|
| A. Structure                                                          |       |
| 0. Normal                                                             | 0     |
| 1. Slight surface irregularities                                      | 1     |
| 2. Moderate surface irregularities                                    | 2     |
| 3. Severe surface irregularities                                      | 3     |
| 4. Clefts/fissures into transitional zone (one-third depth)           | 4     |
| 5. Clefts/fissures into radial zone (two-thirds depth)                | 5     |
| 6. Clefts/fissures into calcified zone (full depth)                   | 6     |
| 7. Fibrillation and/or erosion to transitional zone (one-third depth) | 7     |
| 8. Fibrillation and/or erosion to radial zone (two-thirds depth)      | 8     |
| 9. Fibrillation and/or erosion to calcified zone (full depth)         | 9     |
| 10. Fibrillation and/or erosion to subchondral bone                   | 10    |
| B. Cellularity                                                        |       |
| 0. Normal                                                             | 0     |
| 1. Increase or slight decrease                                        | 1     |
| 2. Moderate decrease                                                  | 2     |
| 3. Severe decrease                                                    | 3     |
| 4. No cells present                                                   | 4     |
| C. Chondrocyte cloning                                                |       |
| 0. Normal                                                             | 0     |
| 1. Several doublets                                                   | 1     |
| 2. Many doublets                                                      | 2     |
| 3. Doublets and triplets                                              | 3     |
| 4. Multiple cell nests                                                | 4     |

**Table S4.** Morphological features of synovium.

| Feature                                                                                                                                                                   | Score |
|---------------------------------------------------------------------------------------------------------------------------------------------------------------------------|-------|
| <b>A. Hyperplasia or enlargement of synovial lining cell layer</b>                                                                                                        |       |
| 1. Absent                                                                                                                                                                 | 0     |
| 2. Slight enlargement (two to three cell layers). Giant cells are very rare                                                                                               | 1     |
| 3. Moderate enlargement (four to five cell layers). Some giant cells or lymphocytes                                                                                       | 2     |
| 4. Strong enlargement (more than six cell layers). Giant cells and lymphocytes are frequent                                                                               | 3     |
| <b>B. Inflammatory infiltration</b>                                                                                                                                       |       |
| 1. Absent                                                                                                                                                                 | 0     |
| 2. Slight inflammatory infiltration (diffusely located single cells and small perivascular aggregates of lymphocytes and/or plasma cells)                                 | 1     |
| 3. Moderate inflammatory infiltration (perivascular and/or superficial lymphatic aggregates, and small sized lymphatic follicles without germinal center may be observed) | 2     |
| 4. Strong inflammatory infiltration (lymphatic follicles with germinal center and/or confluent subsynovial lymphatic infiltration)                                        | 3     |
| <b>C. Activation of synovial stroma/pannus formation</b>                                                                                                                  |       |
| 1. Absent                                                                                                                                                                 | 0     |
| 2. Slight synovial stroma activation (low cellularity with slight edema, slight fibrosis with some fibroblast, no giant cells)                                            | 1     |
| 3. Moderate synovial stroma activation (moderate cellularity with a moderate density of fibroblasts, endothelial cells, and giant cells may be detected)                  | 2     |
| 4. Strong synovial stroma activation (high cellularity with dense distribution of fibroblasts and endothelial cells, and giant cells are abundant)                        | 3     |

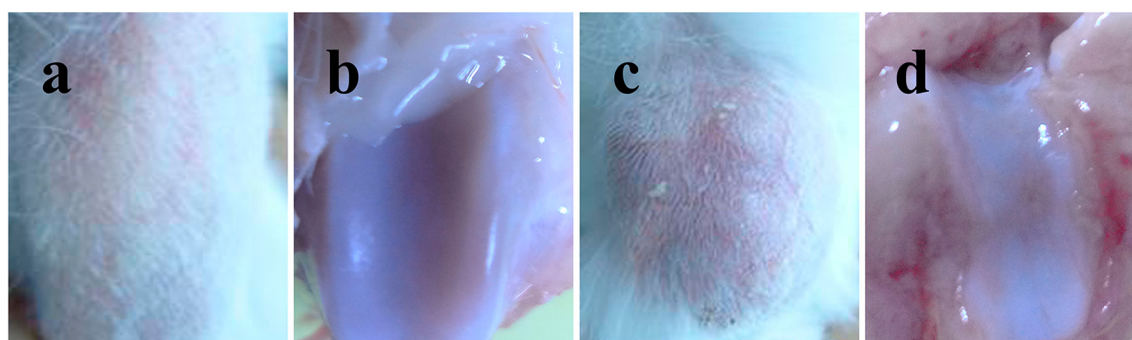

**Figure S1.** Typical appearances of (a) normal and (c) induced rabbit joints, as well as (b and d) cartilage surfaces at 0 day. The results show the changes of OVA-induced RA manifestations at early stage.

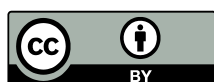

© 2016 by the authors; licensee MDPI, Basel, Switzerland. This article is an open access article distributed under the terms and conditions of the Creative Commons Attribution (CC-BY) license (<http://creativecommons.org/licenses/by/4.0/>).
